# Supplementary material
Source: PubMed Central journal article supplement (PMC3874246)
Supplement: NIHMS514438-supplement-01.pdf [file NIHMS514438-supplement-01.pdf]

1 **APPENDIX (Online Repository)****Table E1.** Intraclass correlation coefficient for ACQ between consecutive visits for stable patients.

| <b>Age 6 to 11</b>             | <b>N</b> | <b>ICC</b> |
|--------------------------------|----------|------------|
| <b>Visit</b>                   |          |            |
| V <sub>2</sub> -V <sub>4</sub> | 26       | 0.46       |
| V <sub>4</sub> -V <sub>5</sub> | 26       | 0.34       |
| V <sub>5</sub> -V <sub>6</sub> | 24       | 0.68       |
| V <sub>6</sub> -V <sub>7</sub> | 24       | 0.66       |
| V <sub>7</sub> -V <sub>8</sub> | 20       | 0.87       |
| V <sub>8</sub> -V <sub>9</sub> | 20       | 0.95       |
| <b>Age 12 to 17</b>            |          |            |
| <b>Visit</b>                   |          |            |
| V <sub>2</sub> -V <sub>4</sub> | 34       | 0.72       |
| V <sub>4</sub> -V <sub>5</sub> | 34       | 0.63       |
| V <sub>5</sub> -V <sub>6</sub> | 30       | 0.70       |
| V <sub>6</sub> -V <sub>7</sub> | 29       | 0.22       |
| V <sub>7</sub> -V <sub>8</sub> | 29       | 0.35       |
| V <sub>8</sub> -V <sub>9</sub> | 29       | 0.74       |

2

3

**Table E2.** Correlation of ACQ to other asthma questionnaires for separate age groups.

| Questionnaire | Pearson Correlation Coefficient (r) | 95% CI      |
|---------------|-------------------------------------|-------------|
| cACT/ACT      |                                     |             |
| 6 to11        | -0.57                               | -0.46,-0.67 |
| 12 to 17      | -0.73                               | -0.64,-0.80 |
| pAQLQ         |                                     |             |
| 6 to11        | -0.71                               | -0.63,-0.78 |
| 12 to 17      | -0.66                               | -0.56,-0.74 |
| ASUI          |                                     |             |
| 6 to11        | -0.74                               | -0.66,-0.80 |
| 12 to 17      | -0.74                               | -0.66,-0.81 |

All groups were statistically significant with  $P < 0.0001$ .

4  
5  
6

**Table E3.** Mean ACQ scores and mean differences in ACQ scores between patients with and without EPAC in prior period for separate age groups.

| <b>Ages 6-11</b>               |                | <b>ACQ Mean (SD)</b> |             | <b>Difference in ACQ</b> |         |
|--------------------------------|----------------|----------------------|-------------|--------------------------|---------|
| Clinical Event                 | #EPAC/% visits | EPAC                 | No EPAC     | Mean (SD)                | P-value |
| EPAC                           | 380/46%        | 1.29 (0.06)          | 0.83 (0.05) | 0.46 (0.01)              | <0.0001 |
| <b>EPAC Components</b>         |                |                      |             |                          |         |
| Decrease in PEFR               | 281/34%        | 1.30 (0.07)          | 0.91 (0.05) | 0.39 (0.07)              | <0.0001 |
| Increase Rescue Medication Use | 186/22%        | 1.54 (0.08)          | 0.89 (0.05) | 0.65 (0.03)              | <0.0001 |
| Urgent Care*                   | 58/7%          | 1.64 (0.12)          | 0.99 (0.05) | 0.65 (0.07)              | <0.0001 |
| Systemic Corticosteroid        | 88/11%         | 1.55 (0.11)          | 0.98 (0.05) | 0.57 (0.06)              | <0.0001 |
| <b>Ages 12-17</b>              |                | <b>ACQ Mean (SD)</b> |             | <b>Difference in ACQ</b> |         |
| Clinical Event                 | #EPAC/% visits | EPAC                 | No EPAC     | Mean (SD)                | P-value |
| EPAC                           | 275/37%        | 1.33 (0.06)          | 1.03 (0.05) | 0.30 (0.02)              | <0.0001 |
| <b>EPAC Components</b>         |                |                      |             |                          |         |
| Decrease in PEFR               | 177/24%        | 1.35 (0.08)          | 1.08 (0.05) | 0.27 (0.04)              | <0.01   |
| Increase Rescue Medication Use | 123/17%        | 1.50 (0.08)          | 1.07 (0.05) | 0.43 (0.04)              | <0.0001 |
| Urgent Care*                   | 29/4%          | 1.66 (0.18)          | 1.12 (0.05) | 0.54 (0.13)              | 0.03    |
| Systemic Corticosteroid        | 65/9%          | 1.43 (0.13)          | 1.11 (0.05) | 0.32 (0.08)              | 0.01    |

\* Urgent care is defined as “urgent unscheduled healthcare contact for asthma” and includes emergency department, hospital, clinic or doctor visits.

7  
8  
9

**Table E4.** Mean change in ACQ scores between consecutive visits by asthma control status for separate age groups.

| Status*                 | N  | Visit Periods | Mean Change in ACQ | 95% CI       |
|-------------------------|----|---------------|--------------------|--------------|
| <b>Age 6 to 11</b>      |    |               |                    |              |
| Good Control            | 97 | 253           | -0.04              | -0.08, 0.01  |
| Worsening Control       | 86 | 102           | 0.33               | 0.13, 0.53   |
| Improved Control        | 91 | 113           | -0.36              | -0.51, -0.21 |
| Continuing Poor Control | 87 | 197           | 0.05               | -0.02, 0.13  |
| <b>Age 12 to 17</b>     |    |               |                    |              |
| Good Control            | 99 | 294           | -0.01              | -0.05, 0.04  |
| Worsening Control       | 69 | 75            | 0.17               | 0.04, 0.39   |
| Improved Control        | 74 | 87            | -0.27              | -0.43, -0.12 |
| Continuing Poor Control | 61 | 140           | 0.07               | -0.04, 0.18  |

10 \*Status: Good Control= no EPAC for two consecutive visits, where EPAC is defined as  $\geq 30\%$  decrease in PEF on  
 11 2 consecutive days or requirement for rescue bronchodilator usage, urgent care visit, or systemic steroid therapy;  
 12 Worsened Control= no EPAC prior to first visit, EPAC between first and second visit; Improved Control= EPAC  
 13 prior to first visit, no EPAC between first and second visit; Continued Poor Control= EPAC before and after first  
 14 visit in sequence. Differences between categories of control was significant by ANOVA ( $P < 0.0001$ ).

15  
 16
